# Supplementary material for: Exploring factors shaping antibiotic resistance patterns in Streptococcus pneumoniae during the 2020 COVID-19 pandemic
Source: eLife. 2024 Mar 7;13:e85701. doi: 10.7554/eLife.85701 (PMC10923560; doi:10.7554/eLife.85701)
Supplement: Figure 1—source data 1. [file elife-85701-fig1-data1.xlsx]

## Sheet: Data_Fig1A
Country	Perc_resistant	Antibiotic_class	Year	n	p
Austria	6.8	penicillin	2019	458	0.068
Belgium	9.7	penicillin	2019	1548	0.097
Croatia	20.1	penicillin	2019	154	0.201
Czechia	4.9	penicillin	2019	387	0.049
Denmark	5	penicillin	2019	601	0.05
Finland	12	penicillin	2019	594	0.12
France	25.3	penicillin	2019	1264	0.253
Germany	5.7	penicillin	2019	1962	0.057
Hungary	6.3	penicillin	2019	222	0.063
Iceland	15.9	penicillin	2019	44	0.159
Ireland	14.4	penicillin	2019	348	0.144
Italy	11.9	penicillin	2019	1017	0.119
Latvia	10.1	penicillin	2019	79	0.101
Lithuania	10.8	penicillin	2019	120	0.108
Malta	33.3	penicillin	2019	27	0.333
Netherlands	4	penicillin	2019	1360	0.04
Norway	6.3	penicillin	2019	504	0.063
Poland	15.5	penicillin	2019	310	0.155
Portugal	13.9	penicillin	2019	887	0.139
Romania	19.8	penicillin	2019	86	0.198
Slovenia	11	penicillin	2019	283	0.11
Spain	19.8	penicillin	2019	958	0.198
Sweden	6.5	penicillin	2019	1070	0.065
United Kingdom	5.7	penicillin	2019	3084	0.057
Austria	12.4	macrolides	2019	547	0.124
Belgium	15.7	macrolides	2019	1548	0.157
Croatia	29.9	macrolides	2019	154	0.299
Czechia	10.3	macrolides	2019	387	0.103
Denmark	3.5	macrolides	2019	601	0.035
Estonia	7	macrolides	2019	158	0.07
Finland	10.5	macrolides	2019	655	0.105
France	19.4	macrolides	2019	1264	0.194
Germany	7.7	macrolides	2019	1970	0.077
Hungary	12.1	macrolides	2019	215	0.121
Iceland	15.9	macrolides	2019	44	0.159
Ireland	12.6	macrolides	2019	340	0.126
Italy	22.3	macrolides	2019	1298	0.223
Lithuania	10.1	macrolides	2019	119	0.101
Malta	28	macrolides	2019	25	0.28
Netherlands	4.8	macrolides	2019	1406	0.048
Norway	5.7	macrolides	2019	459	0.057
Poland	25	macrolides	2019	312	0.25
Portugal	12.8	macrolides	2019	952	0.128
Romania	17.4	macrolides	2019	92	0.174
Slovenia	9.9	macrolides	2019	283	0.099
Spain	21	macrolides	2019	975	0.21
Sweden	6.5	macrolides	2019	1069	0.065
United Kingdom	5.4	macrolides	2019	3340	0.054
Austria	3.9	penicillin	2020	258	0.039
Belgium	14.5	penicillin	2020	858	0.145
Croatia	23.6	penicillin	2020	55	0.236
Czechia	4.4	penicillin	2020	204	0.044
Denmark	6.8	penicillin	2020	351	0.068
Finland	11.5	penicillin	2020	252	0.115
France	32.3	penicillin	2020	668	0.323
Germany	6.1	penicillin	2020	1275	0.061
Hungary	8.9	penicillin	2020	124	0.089
Iceland	30	penicillin	2020	20	0.3
Ireland	17.6	penicillin	2020	136	0.176
Italy	13.4	penicillin	2020	516	0.134
Latvia	17.1	penicillin	2020	41	0.171
Lithuania	13.5	penicillin	2020	96	0.135
Malta	56.3	penicillin	2020	16	0.563
Netherlands	4.8	penicillin	2020	799	0.048
Norway	7.4	penicillin	2020	242	0.074
Poland	10.8	penicillin	2020	158	0.108
Portugal	13.8	penicillin	2020	513	0.138
Romania	38.5	penicillin	2020	39	0.385
Slovenia	13.4	penicillin	2020	172	0.134
Spain	20.7	penicillin	2020	540	0.207
Sweden	8.5	penicillin	2020	544	0.085
United Kingdom	7.4	penicillin	2020	1322	0.074
Austria	11.5	macrolides	2020	295	0.115
Belgium	19.1	macrolides	2020	858	0.191
Croatia	40	macrolides	2020	55	0.4
Czechia	6.9	macrolides	2020	204	0.069
Denmark	3.7	macrolides	2020	351	0.037
Estonia	9.2	macrolides	2020	76	0.092
Finland	11.8	macrolides	2020	288	0.118
France	21.6	macrolides	2020	668	0.216
Germany	7.2	macrolides	2020	1281	0.072
Hungary	17.4	macrolides	2020	115	0.174
Iceland	30	macrolides	2020	20	0.3
Ireland	13.8	macrolides	2020	130	0.138
Italy	24.1	macrolides	2020	639	0.241
Lithuania	14.6	macrolides	2020	172	0.146
Malta	43.8	macrolides	2020	16	0.438
Netherlands	3.5	macrolides	2020	919	0.035
Norway	5.1	macrolides	2020	215	0.051
Poland	22.8	macrolides	2020	123	0.228
Portugal	15.6	macrolides	2020	565	0.156
Romania	27	macrolides	2020	37	0.27
Slovenia	14.5	macrolides	2020	172	0.145
Spain	22.2	macrolides	2020	586	0.222
Sweden	6.6	macrolides	2020	549	0.066
United Kingdom	6	macrolides	2020	1373	0.06

## Sheet: Data_Fig1B
Age	Perc_resistant	Antibiotic_class	Year	n	p
[0-4]	37.2197	penicillin	2019	223	0.372197
[0-4]	43.662	penicillin	2020	142	0.43662
[65+]	23.614	penicillin	2019	487	0.23614
[65+]	33.8843	penicillin	2020	242	0.338843
ALL AGES	26.1841	penicillin	2019	1119	0.261841
ALL AGES	35.5049	penicillin	2020	614	0.355049
[0-4]	31.3901	macrolide	2019	223	0.313901
[0-4]	29.5775	macrolide	2020	142	0.295775
[65+]	20.5339	macrolide	2019	487	0.205339
[65+]	24.7934	macrolide	2020	242	0.247934
ALL AGES	20.9115	macrolide	2019	1119	0.209115
ALL AGES	22.9642	macrolide	2020	614	0.229642

## Sheet: metadata
Perc_resistant (percent of isolates resistant to either penicillin or macrolides)
n (number of total invasive isolates)
p (proportion of isolates resistant to either penicillin or macrolides)
